# Supplementary material for: Comparative Analysis of Preference in Contemporary and Earlier Texts Using Entropy Measures
Source: MDPI journal article supplement (doi:10.3390/e25030486), 2023-03-10
Supplement: s1 [file s1]

# Supplementary Materials: Comparative Analysis of Preference in Contemporary and Earlier Texts Using Entropy Measures

## 1. Previous Work on Temporal Analysis of Language

Kumar *et al.* [1] applied the Kullback-Leibler divergence to histograms derived from the language model of documents to determine the time period of short stories published between 1798 and 2008. Their approach predicted dates of publication, though within a wide range of temporal difference. Garcia-Fernandez *et al.* [2] used several external resources, e.g. Wikipedia, to detect the publication date of article excerpts from seven French newspapers published from the early 19<sup>th</sup> century to the middle of the 20<sup>th</sup> century. Their system correctly detected the year of publication for up to 14% of documents, and the decade of publication for up to 42% of the documents. Ciobanu *et al.* [3] applied temporal text classification to Romanian novels, showing that a high classification accuracy can be achieved with bag-of-word features.

Štajner and Zampieri [4] proposed a supervised method to study stylistic changes in Portuguese historical texts spanning a range from the 17<sup>th</sup> century to the early 20<sup>th</sup> century. They revealed a noticeable shift in lexical diversity and lexical richness of texts written in the 19<sup>th</sup> and 20<sup>th</sup> centuries, compared to the texts from the two preceding centuries. Gómez-Adorno *et al.* [5] analyzed changes in the writing styles of seven authors using stylometric features. They achieved a high level of accuracy in the detection of writing stages for works by some authors. Efremova *et al.* [6] worked on Dutch historical notary acts spanning a period of more than six centuries. First, they identified time periods based on historical events. Then, using Term Frequency–Inverse Document Frequency (TF-IDF) features and spectral clustering, they classified texts into these periods, reaching a high accuracy level.

Liebeskind and Liebeskind [7] applied neural classifiers to historical Hebrew texts from four different periods. They showed that neural networks outperformed classic machine learning algorithms in the task of period classification. Gopidi and Alam [8] studied stylistic differences between prose and poem in two different time spans of 1870–1920 and 1970–2019. They combined quantitative analyses with interpretation based on close reading. Using features derived from grammatical properties, meter and rhyme, they concluded on the basis of their classification results that modern poetry is more similar to prose, in comparison to older poetry and prose. Lagutina *et al.* [9] studied rhythm in 300 English and Russian prosaic texts dating from the 19<sup>th</sup> century to the 21<sup>st</sup> century. They found that rhythm figures change with time and can be regarded as a determinant of an author's style. This approach was extended in Lagutina and Manakhova [10], who analyzed not only rhythm features but also low-level features, i.e. at the level of the word and symbol. They compared stylometric features of texts from each decade and revealed that rhythm features have changed more than other features in the texts under analysis. They also found that the average lengths of sentences decreased in Russian texts in a wave form during the last two centuries, while the average word length increased consistently. Degaetano-Ortlieb [11] used lexical and grammatical models to explore stylistic variation of different groups of language users. She showed that temporal stylistic changes across genders and classes of society can be captured using Relative Entropy (Kullback-Leibler Divergence).

Diachronic analysis of scientific texts have also been addressed in previous studies. For example, Fankhauser *et al.* [12] used topic modeling to monitor topic developments in a corpus of the Royal Society of London. Unsurprisingly, their observations showed that scientific topics have diversified over time, while individual documents have been more specialized in terms of topics. Bizzoni *et al.* [13] proposed to investigate diachronic language changes using Relative Entropy as a measure of diversification. They analyzed scientific English texts published in a period longer than 250 years and showed evidence of register formation and, at the same time, diversification in word usage. Wang *et al.* [14] explored temporal variation of linguistic structures by applying Kolmogorov complexity to different types of scientific texts. Their analysis showed that while the scientific lexicon has been enriched during the time period analyzed, the language complexity has declined in favor of grammatical simplification. There are also studies which focused on more specific language structures in scientific writing, e.g. temporal expressions [15] and *wh*-words [16].

## 2. Approximate Entropy

For series  $X = x(1), \dots, x(n)$ , sub-sequences of length  $m$ ,  $y_i^m = [x(i), \dots, x(i + (m - 1))]$ , and tolerance  $r$ , Approximate Entropy (ApEn) is computed as follows:

1. Compute Chebyshev distance between each sub-sequence  $y_i^m$  and  $y_j^m$ :

$$d_{i,j}^m = \max_k |y_i^m(k) - y_j^m(k)|$$

2. Using the Heaviside function,  $\mathbb{1}(\cdot)$ , whose value is zero for negative arguments and one for positive arguments, for each sub-sequence  $y_i^m$ , compute:

$$C_i^m(r) = \frac{1}{n-m+1} \sum_{j=1}^{n-m+1} \mathbb{1}(r - d_{i,j}^m)$$

3. Compute

$$\phi^m(r) = \frac{1}{n-m+1} \sum_{i=1}^{n-m+1} \log(C_i^m(r))$$

4. Repeat step 1 to 3 for sub-sequences of length  $m+1$  to compute  $\phi^{m+1}(r)$ .
5. Calculate ApEn as

$$\text{ApEn}(m, r) = \phi^m(r) - \phi^{m+1}(r)$$

### 3. Effects of Genre

Genre characteristics may have some effects on structural properties of texts. We analyzed Approximate Entropy (ApEn) and Shannon Entropy (ShEn) of series of 6 POS-tags (Noun, Verb, Adjective, Adverb, Pronoun, Preposition) and sentence length in various genres. We used texts from the US Novel corpus [17]. We analyzed texts written from 1980 to 2000, which are more similar to the contemporary texts in our corpus (JCEFP) in terms of publication time. We did not include multi-labeled texts and we analyzed categories which contained at least 50 texts. As a result, 3168 texts from 7 categories were selected. Figures S1 and S2 show the results for ApEn and ShEn, respectively. As the plots demonstrate, the distribution of ApEn and ShEn are different for the text categories. An ANOVA test confirmed that the distribution of ApEn and ShEn differed between the genres for all text properties. However, the ranking of the genres changes for different text properties and none of them consistently shows the highest or lowest values compared to the other genres.

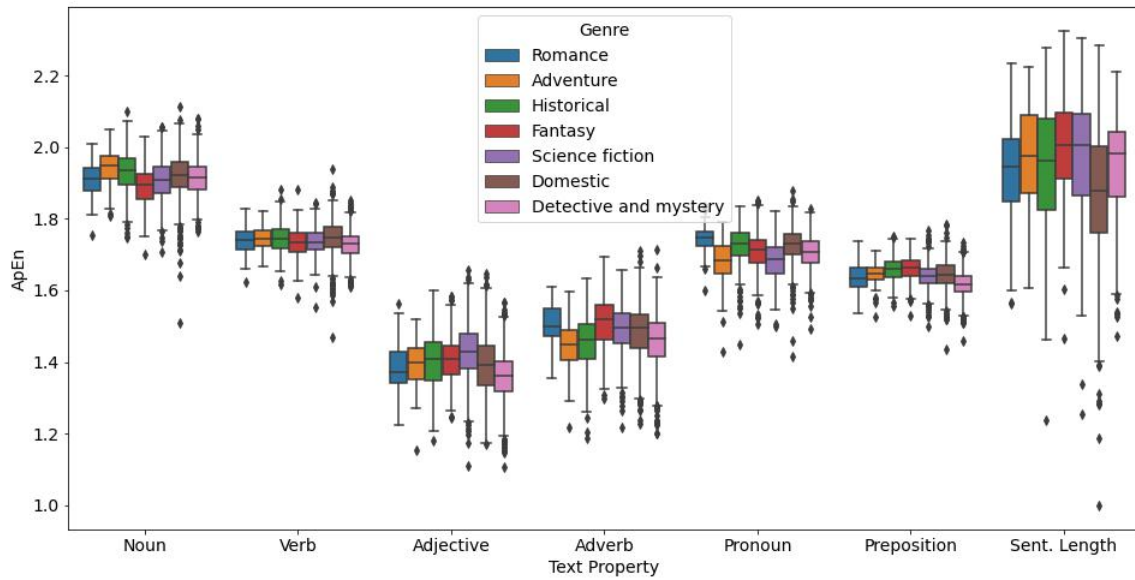

**Figure S1.** Boxplot of ApEn for all genres and for all text properties.

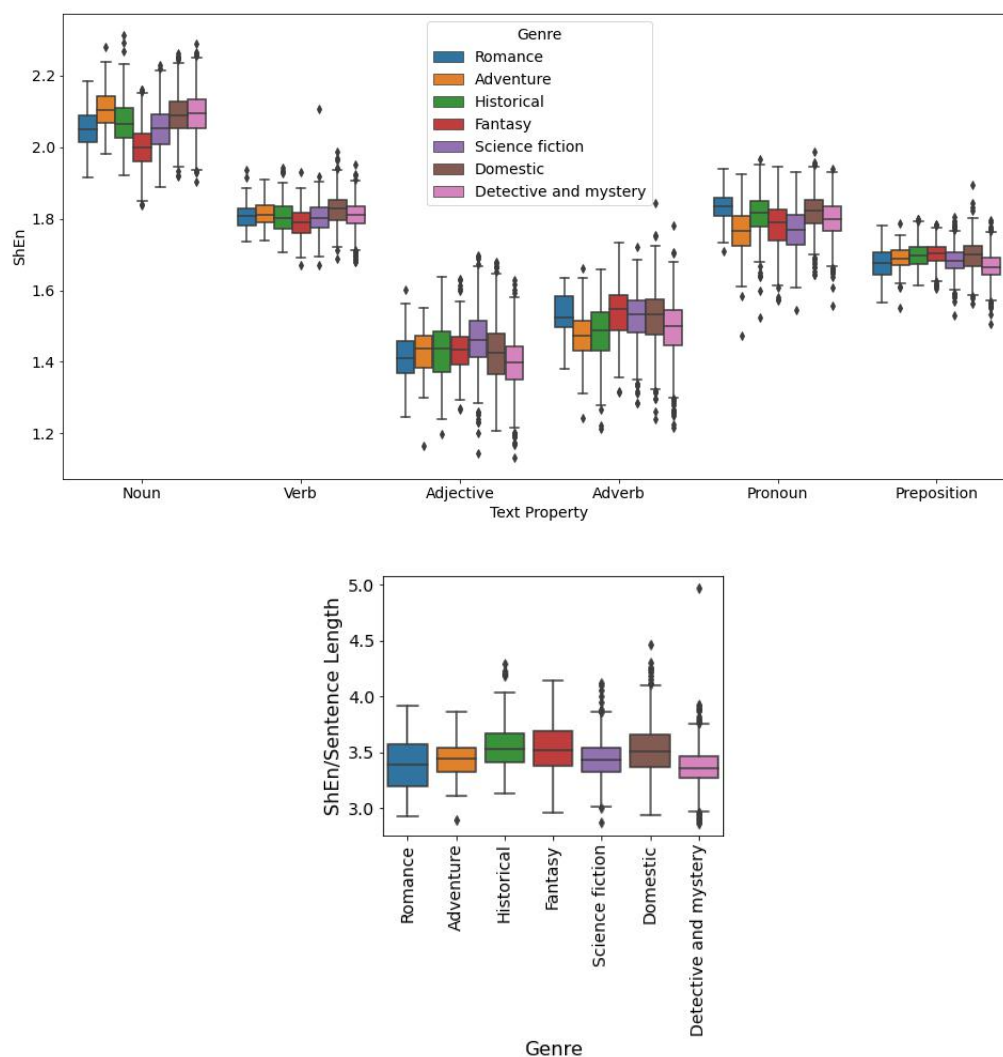

**Figure S2.** Boxplot of ShEn for all genres and for all text properties. The plot of sentence length is separated as its values are in a different range.

#### 4. Tables and Figures

Table S1: List of texts in the Jena Corpus of Contemporary Expository and Fictional Prose (JCEFP Corpus). Bestseller texts were selected from lists of the New York Times Best Sellers. Corpus of non-bestseller texts were downloaded from [www.smashwords.com](http://www.smashwords.com). Non-fictional texts were selected from various sources.

|    | Title                       | Author(s)                      | Year of Publication | Category   |
|----|-----------------------------|--------------------------------|---------------------|------------|
| 1  | 11.22.63                    | Stephen King                   | 2011                | Bestseller |
| 2  | 5th Horseman                | James Patterson, Maxine Paetro | 2006                | Bestseller |
| 3  | A Dance with Dragons        | George R. R. Martin            | 2011                | Bestseller |
| 4  | A Man Called Ove            | Fredrik Backman                | 2012                | Bestseller |
| 5  | A Thousand Splendid Suns    | Khaled Hosseini                | 2007                | Bestseller |
| 6  | Alex Cross                  | James Patterson                | 2009                | Bestseller |
| 7  | All the Light We Cannot See | Anthony Doerr                  | 2014                | Bestseller |
| 8  | Allegiant                   | Veronica Roth                  | 2013                | Bestseller |
| 9  | Angels and Demons           | Dan Brown                      | 2000                | Bestseller |
| 10 | At First Sight              | Nicholas Sparks                | 2005                | Bestseller |
| 11 | Book of the Dead            | Patricia Cornwell              | 2008                | Bestseller |
| 12 | Catching Fire               | Suzanne Collins                | 2009                | Bestseller |
| 13 | Cell                        | Stephen King                   | 2006                | Bestseller |

*Continued on next page*

Table S1 – Continued from previous page

|    | <b>Title</b>                         | <b>Author(s)</b>                  | <b>Year of Publication</b> | <b>Category</b> |
|----|--------------------------------------|-----------------------------------|----------------------------|-----------------|
| 14 | Cross                                | James Patterson                   | 2006                       | Bestseller      |
| 15 | Cross Country                        | James Patterson                   | 2008                       | Bestseller      |
| 16 | Cross Fire                           | James Patterson                   | 2011                       | Bestseller      |
| 17 | Dead or Alive                        | Tom Clancy, Grant Blackwood       | 2010                       | Bestseller      |
| 18 | Dead Reckoning                       | Charlaine Harris                  | 2001                       | Bestseller      |
| 19 | Dear John                            | Nicholas Sparks                   | 2006                       | Bestseller      |
| 20 | Desecration                          | Tim F. LaHaye, Jerry B. Jenkins   | 2001                       | Bestseller      |
| 21 | Doctor Sleep                         | Stephen King                      | 2013                       | Bestseller      |
| 22 | Double Cross                         | James Patterson                   | 2007                       | Bestseller      |
| 23 | Dreamcatcher                         | Stephen King                      | 2001                       | Bestseller      |
| 24 | Eleven on Top                        | Janet Evanovich                   | 2005                       | Bestseller      |
| 25 | Everythings Eventual                 | Stephen King                      | 2002                       | Bestseller      |
| 26 | Fearless Fourteen                    | Janet Evanovich                   | 2008                       | Bestseller      |
| 27 | Fifty Shades Darker                  | EL James                          | 2011                       | Bestseller      |
| 28 | Fifty Shades Freed                   | EL James                          | 2012                       | Bestseller      |
| 29 | Fifty Shades of Grey                 | EL James                          | 2011                       | Bestseller      |
| 30 | Fifty Shades of Louisa May           | L. M. Anonymous                   | 2012                       | Bestseller      |
| 31 | Finger Lickin Fifteen                | Janet Evanovich                   | 2009                       | Bestseller      |
| 32 | Four Blind Mice                      | James Patterson                   | 2001                       | Bestseller      |
| 33 | Freedom                              | Jonathan Franzen                  | 2010                       | Bestseller      |
| 34 | Full Dark, No Stars                  | Stephen King                      | 2010                       | Bestseller      |
| 35 | Go Set a Watchman                    | Harper Lee                        | 2015                       | Bestseller      |
| 36 | Hannibal Rising                      | Thomas Harris                     | 2006                       | Bestseller      |
| 37 | Inferno                              | Dan Brown                         | 2013                       | Bestseller      |
| 38 | Insurgent                            | Veronica Roth                     | 2012                       | Bestseller      |
| 39 | Jack Ryan12 The Teeth Of The Tiger   | Tom Clancy                        | 2003                       | Bestseller      |
| 40 | Kill Alex Cross                      | James Patterson                   | 2011                       | Bestseller      |
| 41 | Light from Heaven                    | Jan Karon                         | 2005                       | Bestseller      |
| 42 | Liseys Story                         | Stephen King                      | 2006                       | Bestseller      |
| 43 | Locked On                            | Tom Clancy, Mark Greaney          | 2011                       | Bestseller      |
| 44 | London Bridges                       | James Patterson                   | 2004                       | Bestseller      |
| 45 | Mary Mary                            | James Patterson                   | 2004                       | Bestseller      |
| 46 | Micro                                | Michael Crichton, Richard Preston | 2011                       | Bestseller      |
| 47 | Mockingjay                           | Suzanne Collins                   | 2010                       | Bestseller      |
| 48 | Next                                 | Michael Crichton                  | 2006                       | Bestseller      |
| 49 | Pirate Latitudes                     | Michael Crichton                  | 2009                       | Bestseller      |
| 50 | Port Mortuary                        | Patricia Cornwell                 | 2010                       | Bestseller      |
| 51 | Prey                                 | Michael Crichton                  | 2002                       | Bestseller      |
| 52 | Red Rabbit                           | Tom Clancy                        | 2002                       | Bestseller      |
| 53 | Safe Haven                           | Nicholas Sparks                   | 2010                       | Bestseller      |
| 54 | Sizzling Sixteen                     | Janet Evanovich                   | 2010                       | Bestseller      |
| 55 | Skippping Christmas                  | John Grisham                      | 2001                       | Bestseller      |
| 56 | Smokin Seventeen                     | Janet Evanovich                   | 2011                       | Bestseller      |
| 57 | State of Fear                        | Michael Crichton                  | 2004                       | Bestseller      |
| 58 | The 6th Target                       | James Patterson, Maxine Paetro    | 2007                       | Bestseller      |
| 59 | The Appeal                           | John Grisham                      | 2008                       | Bestseller      |
| 60 | The Associate                        | John Grisham                      | 2009                       | Bestseller      |
| 61 | The Best of Me                       | Nicholas Sparks                   | 2010                       | Bestseller      |
| 62 | The Big Bad Wolf                     | James Patterson                   | 2003                       | Bestseller      |
| 63 | The Broker                           | John Grisham                      | 2005                       | Bestseller      |
| 64 | The Choice                           | Nicholas Sparks                   | 2007                       | Bestseller      |
| 65 | The Christmas Sweater                | Glenn Beck                        | 2008                       | Bestseller      |
| 66 | The Confession                       | John Grisham                      | 2010                       | Bestseller      |
| 67 | The Da Vinci Code                    | Dan Brown                         | 2003                       | Bestseller      |
| 68 | The Darkest Evening of the Year      | Dean Koontz                       | 2007                       | Bestseller      |
| 69 | The Fault in Our Stars               | John Green                        | 2012                       | Bestseller      |
| 70 | The Five People You Meet in Heaven   | Mitch Albom                       | 2003                       | Bestseller      |
| 71 | The Girl on the Train                | Paula Hawkins                     | 2015                       | Bestseller      |
| 72 | The Girl Who Kicked the Hornets Nest | Stieg Larsson                     | 2007                       | Bestseller      |
| 73 | The Help                             | Kathryn Stockett                  | 2009                       | Bestseller      |
| 74 | The Historian                        | Elizabeth Kostova                 | 2005                       | Bestseller      |
| 75 | The Host                             | Stephenie Meyer                   | 2008                       | Bestseller      |
| 76 | The House of Hades                   | Rick Riordan                      | 2013                       | Bestseller      |

*Continued on next page*

Table S1 – Continued from previous page

|     | <b>Title</b>                                     | <b>Author(s)</b>                       | <b>Year of Publication</b> | <b>Category</b> |
|-----|--------------------------------------------------|----------------------------------------|----------------------------|-----------------|
| 77  | The Hunger Games                                 | Suzanne Collins                        | 2010                       | Bestseller      |
| 78  | The King of Torts                                | John Grisham                           | 2003                       | Bestseller      |
| 79  | The Last Song                                    | Nicholas Sparks                        | 2009                       | Bestseller      |
| 80  | The Litigators                                   | John Grisham                           | 2011                       | Bestseller      |
| 81  | The Lost Symbol                                  | Dan Brown                              | 2009                       | Bestseller      |
| 82  | The Lovely Bones                                 | Alice Sebold                           | 2002                       | Bestseller      |
| 83  | The Mark of Athena                               | Rick Riordan                           | 2012                       | Bestseller      |
| 84  | The Martian                                      | Andy Weir                              | 2014                       | Bestseller      |
| 85  | The Quickie                                      | James Patterson, Michael Led-<br>widge | 2009                       | Bestseller      |
| 86  | The Remnant                                      | Tim LaHaye, Jerry B. Jenkins           | 2002                       | Bestseller      |
| 87  | The Rule of Four                                 | Ian Caldwell and Dustin Thoma-<br>son  | 2004                       | Bestseller      |
| 88  | The Shelters of Stone                            | Jean M. Auel                           | 2002                       | Bestseller      |
| 89  | The Story of Edgar Sawtelle                      | David Wroblewski                       | 2008                       | Bestseller      |
| 90  | The Wedding                                      | Nicholas Sparks                        | 2003                       | Bestseller      |
| 91  | True Believer                                    | Nicholas Sparks                        | 2005                       | Bestseller      |
| 92  | Twelve Sharp                                     | Janet Evanovich                        | 2006                       | Bestseller      |
| 93  | Your Heart Belongs to Me                         | Dean Ray Koontz                        | 2008                       | Bestseller      |
| 94  | A Highland Affair                                | Richard F. Jones                       | 2018                       | Non-Bestseller  |
| 95  | A Long, Cool Rain                                | Linda Seed                             | 2017                       | Non-Bestseller  |
| 96  | A Unicorn's Memoir                               | Stephanie Menges                       | 2020                       | Non-Bestseller  |
| 97  | After the Fire                                   | Kathryn Shay                           | 2003                       | Non-Bestseller  |
| 98  | After the Fog: A Novel                           | Kathleen Shoop                         | 2012                       | Non-Bestseller  |
| 99  | An English Visitor                               | Graham Wilson                          | 2007                       | Non-Bestseller  |
| 100 | An Ignorant Witch                                | E M Graham                             | 2019                       | Non-Bestseller  |
| 101 | Ash and Water                                    | Everleigh Miles                        | 2020                       | Non-Bestseller  |
| 102 | Awakened                                         | Brenda K. Davies                       | 2012                       | Non-Bestseller  |
| 103 | Bad Choices Make Good Stories: Going to New York | Oliver Markus Malloy                   | 2017                       | Non-Bestseller  |
| 104 | Beautiful Secret                                 | Claire Raye                            | 2019                       | Non-Bestseller  |
| 105 | Beg For You: A Small Town Romance                | Sherilee Gray                          | 2019                       | Non-Bestseller  |
| 106 | Breaking the Rules                               | Ruth Ann Nordin                        | 2020                       | Non-Bestseller  |
| 107 | Bridge Through Time                              | Scott Spotson                          | 2014                       | Non-Bestseller  |
| 108 | Cactus Island                                    | William Manchee                        | 2006                       | Non-Bestseller  |
| 109 | Case of the One-Eyed Tiger                       | Jeffrey M. Poole                       | 2020                       | Non-Bestseller  |
| 110 | Christmas Magic                                  | Alexandra Moody                        | 2018                       | Non-Bestseller  |
| 111 | Clocks Locks and Danger                          | Lizzie Lewis                           | 2020                       | Non-Bestseller  |
| 112 | Co-Ed                                            | Rachel Van Dyken                       | 2018                       | Non-Bestseller  |
| 113 | Cole                                             | Tory Richards                          | 2019                       | Non-Bestseller  |
| 114 | Crocodile Man                                    | Graham Wilson                          | 2017                       | Non-Bestseller  |
| 115 | Darkhouse                                        | Karina Halle                           | 2011                       | Non-Bestseller  |
| 116 | Delusions                                        | Christina Smith                        | 2012                       | Non-Bestseller  |
| 117 | Dragma's Keep                                    | Vance Pumphrey                         | 2015                       | Non-Bestseller  |
| 118 | Dreaming of You                                  | S.E. Felida                            | 2020                       | Non-Bestseller  |
| 119 | Duly Noted                                       | H.M. Shander                           | 2016                       | Non-Bestseller  |
| 120 | Dying for a Living                               | Kory M. Shrum                          | 2014                       | Non-Bestseller  |
| 121 | Elfin                                            | Quinn Loftis                           | 2012                       | Non-Bestseller  |
| 122 | Eternally Bound                                  | Brenda K. Davies                       | 2016                       | Non-Bestseller  |
| 123 | Ever Onward                                      | Wayne Mee                              | 2011                       | Non-Bestseller  |
| 124 | Everything we Lost                               | Kate Smith                             | 2016                       | Non-Bestseller  |
| 125 | Falling For You                                  | Leeanna Morgan                         | 2018                       | Non-Bestseller  |
| 126 | Falling Into The Black                           | Lauren Runow                           | 2017                       | Non-Bestseller  |
| 127 | Fated Dreams                                     | Christina Smith                        | 2012                       | Non-Bestseller  |
| 128 | Fighting Destiny                                 | Amelia Hutchins                        | 2013                       | Non-Bestseller  |
| 129 | Fire Song                                        | Val St. Crowe                          | 2016                       | Non-Bestseller  |
| 130 | Frey                                             | Melissa Wright                         | 2019                       | Non-Bestseller  |
| 131 | Genesis Code                                     | Eliza Green                            | 2012                       | Non-Bestseller  |
| 132 | Girl in a Cage                                   | Graham Wilson                          | 2019                       | Non-Bestseller  |
| 133 | Governor                                         | Lesli Richardson                       | 2018                       | Non-Bestseller  |
| 134 | Hellfire - Treachery                             | Simon Goodson                          | 2020                       | Non-Bestseller  |
| 135 | Human Intelligence                               | Klaus Marre                            | 2013                       | Non-Bestseller  |
| 136 | I Woke Up Feeling Thailand                       | D. Bruno Starrs                        | 2012                       | Non-Bestseller  |
| 137 | Ice Homme                                        | Vance Pumphrey                         | 2015                       | Non-Bestseller  |

Continued on next page

Table S1 – Continued from previous page

|     | <b>Title</b>                            | <b>Author(s)</b>           | <b>Year of Publication</b> | <b>Category</b> |
|-----|-----------------------------------------|----------------------------|----------------------------|-----------------|
| 138 | In Defense of Mankind                   | Ron L. Carter, H.R. Carter | 2019                       | Non-Bestseller  |
| 139 | Just One Kiss                           | Jami Rogers                | 2020                       | Non-Bestseller  |
| 140 | Just Visiting                           | Graham Wilson              | 2015                       | Non-Bestseller  |
| 141 | Killing Me Softly                       | Bianca Sloane              | 2012                       | Non-Bestseller  |
| 142 | King's Crown                            | Marie Johnston             | 2020                       | Non-Bestseller  |
| 143 | Last Breath                             | Greg Tuck                  | 2015                       | Non-Bestseller  |
| 144 | Legacy of Darkness: Undercover Mistress | Dai Fuse                   | 2020                       | Non-Bestseller  |
| 145 | Like a Memory                           | Abbi Glines                | 2017                       | Non-Bestseller  |
| 146 | Little Lost Girl                        | Graham Wilson              | 2011                       | Non-Bestseller  |
| 147 | Lost                                    | Jodi Kae                   | 2016                       | Non-Bestseller  |
| 148 | Lost Girl                               | Chanda Hahn                | 2016                       | Non-Bestseller  |
| 149 | Lost in Me                              | Lexi Ryan                  | 2014                       | Non-Bestseller  |
| 150 | Loveoid                                 | J.L. Morin                 | 2020                       | Non-Bestseller  |
| 151 | Moonstone                               | Linda Seed                 | 2015                       | Non-Bestseller  |
| 152 | Mystic Mayhem                           | Sally J. Smith             | 2015                       | Non-Bestseller  |
| 153 | No More Tears                           | Sandy Appleyard            | 2020                       | Non-Bestseller  |
| 154 | Nowhere Man                             | Graham Wilson              | 2020                       | Non-Bestseller  |
| 155 | Of Beast and Beauty                     | Chanda Hahn                | 2019                       | Non-Bestseller  |
| 156 | Our Broken Pieces                       | M.E. Clayton               | 2020                       | Non-Bestseller  |
| 157 | Pierced                                 | Sydney Landon              | 2015                       | Non-Bestseller  |
| 158 | Possession                              | Graham Wilson              | 2018                       | Non-Bestseller  |
| 159 | Prince of Wolves                        | Quinn Loftis               | 2013                       | Non-Bestseller  |
| 160 | Ragnarok Conspiracy                     | Rob J. Meijer              | 2018                       | Non-Bestseller  |
| 161 | Red Hot Mama                            | Reagan McDaniels           | 2021                       | Non-Bestseller  |
| 162 | Redemption Lake                         | Susan Clayton-Goldner      | 2017                       | Non-Bestseller  |
| 163 | Return of the Breaker                   | Graham Wilson              | 2018                       | Non-Bestseller  |
| 164 | Riley 's Secret                         | Christina Smith            | 2012                       | Non-Bestseller  |
| 165 | Riley 's Torment                        | Christina Smith            | 2013                       | Non-Bestseller  |
| 166 | Rise of the Gladiator                   | Cheree Alsop               | 2020                       | Non-Bestseller  |
| 167 | Rosebloom                               | Christine Keleny           | 2008                       | Non-Bestseller  |
| 168 | Safe Haven                              | Leeanna Morgan             | 2016                       | Non-Bestseller  |
| 169 | Saving Grace                            | Sandy James                | 2013                       | Non-Bestseller  |
| 170 | Sealed with a Kiss                      | Leeanna Morgan             | 2016                       | Non-Bestseller  |
| 171 | Seeking Dr. Magic                       | Scott Spotson              | 2018                       | Non-Bestseller  |
| 172 | Shadow Phantoms                         | H.P. Mallory               | 2020                       | Non-Bestseller  |
| 173 | Silent Star                             | James F. David             | 2014                       | Non-Bestseller  |
| 174 | Some Call it Love                       | Sarah Peis                 | 2018                       | Non-Bestseller  |
| 175 | Soul of the Dragon                      | Natalie J. Damschroder     | 2012                       | Non-Bestseller  |
| 176 | The American Terrorist                  | Ron L. Carter              | 2012                       | Non-Bestseller  |
| 177 | The Broken                              | Igor Ljubuncic             | 2013                       | Non-Bestseller  |
| 178 | The Bulldog                             | Tricia Andersen            | 2019                       | Non-Bestseller  |
| 179 | The Diary                               | Graham Wilson              | 2014                       | Non-Bestseller  |
| 180 | The Dragon Question                     | L. Darby Gibbs             | 2018                       | Non-Bestseller  |
| 181 | The Dragon's Slave                      | Lacey St. Sin              | 2016                       | Non-Bestseller  |
| 182 | The Empty Place                         | Graham Wilson              | 2014                       | Non-Bestseller  |
| 183 | The Heartbreaker                        | Tricia Andersen            | 2015                       | Non-Bestseller  |
| 184 | The House on Persimmon Road             | Jackie Weger               | 2014                       | Non-Bestseller  |
| 185 | The Library of Antiquity                | Vance Pumphrey             | 2013                       | Non-Bestseller  |
| 186 | The Mystery of the Hidden Jewels        | Carrie Cross               | 2014                       | Non-Bestseller  |
| 187 | The Old Balmain House                   | Graham Wilson              | 2011                       | Non-Bestseller  |
| 188 | The Platinum Dragon                     | Vance Pumphrey             | 2015                       | Non-Bestseller  |
| 189 | The Prophecy                            | Jeffrey M. Poole           | 2012                       | Non-Bestseller  |
| 190 | The Storm Inside                        | Alexis Anne                | 2013                       | Non-Bestseller  |
| 191 | The Strange Life of Brandon Chambers    | Scott Spotson              | 2020                       | Non-Bestseller  |
| 192 | The Truth About James                   | Sarah Tork                 | 2014                       | Non-Bestseller  |
| 193 | The Valkyrie                            | L K Walker                 | 2018                       | Non-Bestseller  |
| 194 | The Watchers                            | Lynnie Purcell             | 2011                       | Non-Bestseller  |
| 195 | Theft of the Giant's Soul               | Mark Cheverton             | 2019                       | Non-Bestseller  |
| 196 | Trapped                                 | Graham Wilson              | 2017                       | Non-Bestseller  |
| 197 | Trigger                                 | L. P. Dover                | 2017                       | Non-Bestseller  |
| 198 | True Colors                             | Melissa Pearl              | 2014                       | Non-Bestseller  |
| 199 | Unlucky Charm                           | Kimberly Gordon            | 2017                       | Non-Bestseller  |
| 200 | Wagon Trail Bride                       | Ruth Ann Nordin            | 2016                       | Non-Bestseller  |

*Continued on next page*

Table S1 – Continued from previous page

|     | Title                                                                                                      | Author(s)                                            | Year of Publication | Category       |
|-----|------------------------------------------------------------------------------------------------------------|------------------------------------------------------|---------------------|----------------|
| 201 | Wild On You                                                                                                | Justiss Alliance                                     | 2014                | Non-Bestseller |
| 202 | Witch's Bell                                                                                               | Odette C. Bell                                       | 2010                | Non-Bestseller |
| 203 | Yesterday's Sins                                                                                           | Shirley Wine                                         | 2012                | Non-Bestseller |
| 204 | A Compendium of Philosophical Concepts and Methods                                                         | Peter S. Fosl: JULIAN BAGGINI                        | 2020                | Nonfictional   |
| 205 | A Grand Origin for Grand Canyon                                                                            | Michael Oard                                         | 2014                | Nonfictional   |
| 206 | Act Natural: A Cultural History of Misadventures in Parenting                                              | Jennifer Traig                                       | 2019                | Nonfictional   |
| 207 | Aesthetics Volume II                                                                                       | Dietrich von Hildebrand                              | 2019                | Nonfictional   |
| 208 | AI Ethics                                                                                                  | Mark Coeckelbergh                                    | 2020                | Nonfictional   |
| 209 | Anatomy 101: From Muscles and Bones to Organs and Systems Your Guide to How the Human Body Works           | Kevin Langford                                       | 2015                | Nonfictional   |
| 210 | Aristotle's ladder, Darwin's tree : the evolution of visual metaphors for biological order                 | J. David Archibald                                   | 2014                | Nonfictional   |
| 211 | Art and Architecture of Viceregal Latin America 1521-1821                                                  | Kelly Donahue Wallace                                | 2008                | Nonfictional   |
| 212 | Awkward: The Science of Why We're Socially Awkward and Why That's Awesome                                  | Ty Tashiro                                           | 2017                | Nonfictional   |
| 213 | Balance: A Dizzying Journey Through the Science of Our Most Delicate Sense                                 | Carol Svec                                           | 2017                | Nonfictional   |
| 214 | Biochemistry                                                                                               | Denise R. Ferrier PhD                                | 2013                | Nonfictional   |
| 215 | Biostatistics: The Bare Essentials                                                                         | Geoffrey R. Norman David L. Sreiner                  | 2014                | Nonfictional   |
| 216 | Bird Sense: What It's Like to Be a Bird                                                                    | Tim Birkhead                                         | 2012                | Nonfictional   |
| 217 | Blind Descent: The Quest to Discover the Deepest Place on Earth                                            | James M. Tabor                                       | 2010                | Nonfictional   |
| 218 | Cannibalism: A Perfectly Natural History                                                                   | Bill Schutt                                          | 2017                | Nonfictional   |
| 219 | City Shaped Churches: Planting Churches in a Global Era                                                    | Linda Bergquist Michael Crane                        | 2018                | Nonfictional   |
| 220 | Climate Action Planning: A Guide to Creating Low Carbon Resilient Communities                              | Michael R. Boswell, Adrienne I. Greve Tammy L. Seale | 2019                | Nonfictional   |
| 221 | Communication and Capitalism: A Critical Theory                                                            | Christian Fuchs                                      | 2020                | Nonfictional   |
| 222 | Competition Overdose: How Free Market Mythology Transformed Us from Citizen Kings to Market Servants       | Maurice E. Stucke: Ariel Ezrachi                     | 2020                | Nonfictional   |
| 223 | Conflict and Contest in Nietzsche's Philosophy                                                             | Herman Siemens: James Pearson                        | 2019                | Nonfictional   |
| 224 | Coping with Trauma Related Dissociation: Skills Training for Patients and Therapists                       | Suzette Boon, Kathy Steele, Onno van der Hart        | 2011                | Nonfictional   |
| 225 | Copyright Law for Librarians and Educators                                                                 | Kenneth D. Crews                                     | 2011                | Nonfictional   |
| 226 | Cosmic DNA at the Origin: A Hyperdimension before the Big Bang: the Infinite Spiral Staircase Theory       | Chris H. Hardy                                       | 2015                | Nonfictional   |
| 227 | Dazzled and Deceived: Mimicry and Camouflage                                                               | Peter Forbes                                         | 2011                | Nonfictional   |
| 228 | Decriminalizing Domestic Violence: A Balanced Policy Approach to Intimate Partner Violence                 | Leigh Goodmark                                       | 2018                | Nonfictional   |
| 229 | Dog Behaviour Evolution and Cognition                                                                      | Adam Miklosi                                         | 2015                | Nonfictional   |
| 230 | Drawn from Paradise: The Natural History Art and Discovery of the Birds of Paradise with Rare Archival Art | David Attenborough, Errol Fuller                     | 2012                | Nonfictional   |
| 231 | EcoCities: Rebuilding Cities in Balance with Nature                                                        | Richard Register                                     | 2006                | Nonfictional   |
| 232 | Emotional Intelligence: Emotional Mastery Influence                                                        | Modern Psychology Publishing                         | 2019                | Nonfictional   |
| 233 | Enforcement of Maritime Claims                                                                             | David Jackson                                        | 2005                | Nonfictional   |
| 234 | Environmental and Low Temperature Geochemistry                                                             | Peter Ryan                                           | 2019                | Nonfictional   |
| 235 | Epistemology and the Psychology of Human Judgment                                                          | Michael A. Bishop, J. D. Trout                       | 2005                | Nonfictional   |
| 236 | Essentials of Environmental Health                                                                         | Robert H. Friis                                      | 2012                | Nonfictional   |
| 237 | Ethnosociology: The Foundations                                                                            | Alexander Dugin                                      | 2019                | Nonfictional   |
| 238 | Five Pillars of the Mind: Redesigning Education to Suit the Brain                                          | Tracey Tokuhama Espinosa                             | 2019                | Nonfictional   |
| 239 | Fundamentals of Structural Mechanics Dynamics and Stability                                                | A.I. Rusakov                                         | 2020                | Nonfictional   |
| 240 | Geology by Design: Interpreting Rocks and their Catastrophic Record                                        | Carl R. Froede                                       | 2007                | Nonfictional   |
| 241 | Global Sales and Contract Law                                                                              | Ingeborg Schwenzer, Christopher Kee, Pascal Hachem   | 2012                | Nonfictional   |

Continued on next page

Table S1 – Continued from previous page

|     | <b>Title</b>                                                                                             | <b>Author(s)</b>                                   | <b>Year of Publication</b> | <b>Category</b> |
|-----|----------------------------------------------------------------------------------------------------------|----------------------------------------------------|----------------------------|-----------------|
| 242 | Happy City: Transforming Our Lives Through Urban Design                                                  | Charles Montgomery                                 | 2015                       | Nonfictional    |
| 243 | Hegel on Possibility: Modality Perfection and Dialectics                                                 | Nahum Brown                                        | 2020                       | Nonfictional    |
| 244 | Historical Dictionary of Romantic Art and Architecture                                                   | Allison Lee Palmer                                 | 2019                       | Nonfictional    |
| 245 | How Not to Be Wrong: The Power of Mathematical Thinking                                                  | Jordan Ellenberg                                   | 2014                       | Nonfictional    |
| 246 | How Sexual Desire Works: The Enigmatic Urge                                                              | Frederick Toates                                   | 2014                       | Nonfictional    |
| 247 | Human Nature                                                                                             | David Berlinski                                    | 2019                       | Nonfictional    |
| 248 | Indian Philosophy: A Reader                                                                              | Jonardon Ganeri                                    | 2020                       | Nonfictional    |
| 249 | Lessons from Nanoelectronics: A New Perspective on Transport                                             | Supriyo Datta                                      | 2012                       | Nonfictional    |
| 250 | Leviathan or The Whale                                                                                   | Philip Hoare                                       | 2009                       | Nonfictional    |
| 251 | Life Unfolding: How the Human Body Creates Itself                                                        | Jamie A. Davies                                    | 2014                       | Nonfictional    |
| 252 | Liquid: The Delightful and Dangerous Substances That Flow Through Our Lives                              | Mark Miodownik                                     | 2018                       | Nonfictional    |
| 253 | Marine Insurance Legislation                                                                             | Robert Merkin, Jennifer Lavelle                    | 2010                       | Nonfictional    |
| 254 | Molecules Microbes and Meals: The Surprising Science of Food                                             | Alan Kelly                                         | 2019                       | Nonfictional    |
| 255 | Natural Law and Human Rights: Toward a Recovery of Practical Reason                                      | Pierre Manent, Ralph C. Hancock, Daniel J. Mahoney | 2020                       | Nonfictional    |
| 256 | Night School: Wake Up to the Power of Sleep                                                              | Richard Wiseman                                    | 2014                       | Nonfictional    |
| 257 | On Food and Cooking: The Science and Lore of the Kitchen rev. and updated                                | Harold McGee                                       | 2004                       | Nonfictional    |
| 258 | Particle Physics: An Introduction                                                                        | Robert Purdy                                       | 2018                       | Nonfictional    |
| 259 | Philosophy: A Christian Introduction                                                                     | James K. Dew, Jr.: Paul M. Gould                   | 2019                       | Nonfictional    |
| 260 | Preserving: The canning and freezing guide for all seasons                                               | Pat Crocker                                        | 2012                       | Nonfictional    |
| 261 | Principles of International Economic Law                                                                 | Matthias Herdegen                                  | 2016                       | Nonfictional    |
| 262 | Psychology moment by moment: a guide to enhancing your clinical practice with mindfulness and meditation | Elise E. Labbe                                     | 2011                       | Nonfictional    |
| 263 | Radically Open Dialectical Behavior Therapy: Theory and Practice for Treating Disorders of Overcontrol   | Thomas R. Lynch                                    | 2018                       | Nonfictional    |
| 264 | Rest Play Grow: Making Sense of Preschoolers (or Anyone Who Acts Like One)                               | Deborah MacNamara                                  | 2016                       | Nonfictional    |
| 265 | Revolution in Mind: The Creation of Psychoanalysis                                                       | George Makari                                      | 2008                       | Nonfictional    |
| 266 | Same Sex Parenting Research: A Critical Assessment                                                       | Walter R. Schumm                                   | 2018                       | Nonfictional    |
| 267 | Say What You Mean: A Mindful Approach to Nonviolent Communication                                        | Oren Jay Sofer                                     | 2018                       | Nonfictional    |
| 268 | Science in Black and White: How Biology and Environment Shape Our Racial Divide                          | Alondra Oubre                                      | 2020                       | Nonfictional    |
| 269 | Secrets of Your Cells: Discovering your body's Inner Intelligence                                        | Sondra Barrett                                     | 2013                       | Nonfictional    |
| 270 | Sex and the Failed Absolute                                                                              | Slavoj Žižek                                       | 2019                       | Nonfictional    |
| 271 | Sex on Earth: A Celebration of Animal Reproduction                                                       | Jules Howard                                       | 2015                       | Nonfictional    |
| 272 | Ship Registration: Law and Practice                                                                      | Richard Coles, Edward Watt                         | 2002                       | Nonfictional    |
| 273 | Smells: A Cultural History of Odours in Early Modern Times                                               | Robert Muchembled                                  | 2020                       | Nonfictional    |
| 274 | Social Problems: Community Policy and Social Action                                                      | Anna Leon Guerrero                                 | 2018                       | Nonfictional    |
| 275 | Social Psychology                                                                                        | Thomas E. Heinzen, Wind Goodfriend                 | 2018                       | Nonfictional    |
| 276 | Spheres of Influence: The Social Ecology of Racial and Class Inequality                                  | Douglas S. Massey                                  | 2014                       | Nonfictional    |
| 277 | Structural Geology                                                                                       | Haakon Fossen                                      | 2016                       | Nonfictional    |
| 278 | Sustainable Landscape Construction: A Guide to Green Building Outdoors                                   | Kim Sorvig J. William Thompson                     | 2018                       | Nonfictional    |
| 279 | The Age of Surveillance Capitalism: The Fight for a Human Future at the New Frontier of Power            | Shoshana Zuboff                                    | 2019                       | Nonfictional    |
| 280 | The Aquaponic Farmer: A Complete Guide to Building and Operating a Commercial Aquaponic System           | Adrian Southern, Whelm King                        | 2017                       | Nonfictional    |
| 281 | The Architecture of Learning: Designing Instruction for the Learning Brain                               | Kevin D. Washburn                                  | 2010                       | Nonfictional    |

Continued on next page



Table S1 – Continued from previous page

|     | <b>Title</b>                                                                                                    | <b>Author(s)</b>                     | <b>Year of Publication</b> | <b>Category</b> |
|-----|-----------------------------------------------------------------------------------------------------------------|--------------------------------------|----------------------------|-----------------|
| 282 | The Battery: How Portable Power Sparked a Technological Revolution                                              | Henry Schlesinger                    | 2010                       | Nonfictional    |
| 283 | The Charisma Myth: How Anyone Can Master the Art and Science of Personal Magnetism                              | Olivia Fox Cabane                    | 2012                       | Nonfictional    |
| 284 | The Chemistry of Wine: From Blossom to Beverage and Beyond                                                      | David R. Dalton                      | 2017                       | Nonfictional    |
| 285 | The Constitution in Exile: How the Federal Government Has Seized Power by Rewriting the Supreme Law of the Land | Andrew P. Napolitano                 | 2007                       | Nonfictional    |
| 286 | The Constitution: An Introduction                                                                               | Michael Stokes Paulsen, Luke Paulsen | 2015                       | Nonfictional    |
| 287 | The Copenhagen Conspiracy                                                                                       | David Ferry                          | 2019                       | Nonfictional    |
| 288 | The dolphin in the mirror : exploring dolphin minds and saving dolphin lives                                    | Reiss Diana                          | 2011                       | Nonfictional    |
| 289 | The Dream Universe: How Fundamental Physics Lost Its Way                                                        | David Lindley                        | 2020                       | Nonfictional    |
| 290 | The Empathy Advantage: Coaching Children to Be Kind Respectful and Successful                                   | Lynne Azarchi                        | 2021                       | Nonfictional    |
| 291 | The End of Ownership: Personal property in the digital economy                                                  | Aaron Perzanowski, Jason Schultz     | 2016                       | Nonfictional    |
| 292 | The Equations World                                                                                             | Boris Pritsker                       | 2019                       | Nonfictional    |
| 293 | The Evolution of Beauty: How Darwin's Forgotten Theory of Mate Choice Shapes the Animal World and Us            | Richard O. Prum                      | 2017                       | Nonfictional    |
| 294 | The Greatest Show on Earth: The Evidence for Evolution                                                          | Richard Dawkins                      | 2009                       | Nonfictional    |
| 295 | The Kingdom of Infinite Number: A Field Guide                                                                   | Bryan Bunch                          | 2011                       | Nonfictional    |
| 296 | The Law of State Immunity                                                                                       | Hazel Fox, QC and Philippa Webb      | 2013                       | Nonfictional    |
| 297 | The Life Organic: The Theoretical Biology Club and the Roots of Epigenetics                                     | Erik L. Peterson                     | 2017                       | Nonfictional    |
| 298 | The Limits of Epistemology                                                                                      | Markus Gabriel, Alex Englander       | 2020                       | Nonfictional    |
| 299 | The Longing for Less: Living with Minimalism                                                                    | Kyle Chayka                          | 2020                       | Nonfictional    |
| 300 | The Map That Changed the World: William Smith and the Birth of Modern Geology                                   | Simon Winchester                     | 2009                       | Nonfictional    |
| 301 | The Master and His Emissary: The Divided Brain and the Making of the Western World                              | Iain McGilchrist                     | 2019                       | Nonfictional    |
| 302 | The Music of the Primes: Searching to Solve the Greatest Mystery in Mathematics                                 | Marcus du Sautoy                     | 2012                       | Nonfictional    |
| 303 | The Narrow Corridor: States Societies and the Fate of Liberty                                                   | Daron Acemoglu, James A. Robinson    | 2019                       | Nonfictional    |
| 304 | The New Evil: Understanding the Emergence of Modern Violent Crime                                               | Michael H. Stone: Gary Brucato       | 2019                       | Nonfictional    |
| 305 | The Origins of Political Order: From Prehuman Times to the French Revolution                                    | Francis Fukuyama                     | 2011                       | Nonfictional    |
| 306 | The paradox of choice: why more is less                                                                         | Barry Schwartz                       | 2005                       | Nonfictional    |
| 307 | The Pope of Physics: Enrico Fermi and the Birth of the Atomic Age                                               | Gino Segrè Bettina Hoerlin           | 2016                       | Nonfictional    |
| 308 | The Post Traumatic Stress Disorder Sourcebook: A Guide to Healing Recovery and Growth                           | Glenn R. Schiraldi                   | 2016                       | Nonfictional    |
| 309 | The Science of Communicating Science: The Ultimate Guide                                                        | Craig Cormick                        | 2020                       | Nonfictional    |
| 310 | The Silencing: How the Left is Killing Free Speech                                                              | Kirsten Powers                       | 2015                       | Nonfictional    |
| 311 | The Sixth Extinction: An Unnatural History                                                                      | Elizabeth Kolbert                    | 2014                       | Nonfictional    |
| 312 | The Social Lens: An Invitation to Social and Sociological Theory                                                | Kenneth Allan                        | 2013                       | Nonfictional    |
| 313 | The Story of Light                                                                                              | Ben Bova                             | 2012                       | Nonfictional    |
| 314 | The World According to Physics                                                                                  | Jim Al Khalili                       | 2020                       | Nonfictional    |
| 315 | Thinking fast and slow                                                                                          | Kahneman Daniel                      | 2015                       | Nonfictional    |
| 316 | This Life: Secular Faith and Spiritual Freedom                                                                  | Martin Hagglund                      | 2019                       | Nonfictional    |
| 317 | Unconditional Parenting: Moving from Rewards and Punishments to Love and Reason                                 | Alfie Kohn                           | 2006                       | Nonfictional    |
| 318 | Underground: A Human History of the Worlds Beneath Our Feet                                                     | Will Hunt                            | 2019                       | Nonfictional    |

Continued on next page

Table S1 – Continued from previous page

|     | Title                                                                                          | Author(s)           | Year of Publication | Category     |
|-----|------------------------------------------------------------------------------------------------|---------------------|---------------------|--------------|
| 319 | Unequal Childhoods: Class Race and Family Life<br>Second Edition with an Update a Decade Later | Annette Lareau      | 2011                | Nonfictional |
| 320 | Unpeople: Britain's Secret Human Rights Abuses                                                 | Mark Curtis         | 2004                | Nonfictional |
| 321 | What the Nose Tells the Mind                                                                   | A. S. Barwich       | 2020                | Nonfictional |
| 322 | Why Diets Make Us Fat: The Unintended Consequences of Our Obsession With Weight Loss           | Sandra Aamodt       | 2016                | Nonfictional |
| 323 | Why You Hear What You Hear: An Experiential Approach to Sound Music and Psychoacoustics        | Eric J. Heller      | 2013                | Nonfictional |
| 324 | Witcraft: The Invention of Philosophy in English                                               | Jonathan Ree        | 2019                | Nonfictional |
| 325 | Words That Change Minds: The 14 Patterns for Mastering the Language of Influence               | Shelle Rose Charvet | 2019                | Nonfictional |

Table S2: Median values of Approximate Entropy (ApEn) for all text properties and for all fictional text categories. ApEn values were analyzed for contemporary fictional ( $N = 204$ ) vs. non-fictional ( $N = 122$ ) texts, and for earlier fictional ( $N = 206$ ) vs. earlier non-fictional ( $N = 185$ ) texts. The asterisks indicate whether the differences between the two text categories in contemporary or earlier text categories are statistically significant (Mann-Whitney U test; ns, not significant; \*,  $p \leq 0.05$ ; \*\*,  $p \leq 0.01$ ; and \*\*\*,  $p \leq 0.001$ ). Values that are significantly higher within a pair of columns are shown in boldface. 95% confidence intervals for the median (according to [18]) are shown in parentheses. Data for earlier texts are from the study by Mohseni *et al.* [19].

| Text Property   | Contemporary               |                                         | Earlier                     |                                            |
|-----------------|----------------------------|-----------------------------------------|-----------------------------|--------------------------------------------|
|                 | Fictional                  | Non-Fictional                           | Fictional                   | Non-Fictional                              |
| Sentence Length | 2.01 (1.99, 2.02)          | 1.98 (1.96, 2.00) <sup>ns</sup>         | 1.87 (1.86, 1.88)           | 1.90 (1.88, 1.92) <sup>ns</sup>            |
| Noun            | 1.89 (1.88, 1.90)          | 1.90 (1.88, 1.91) <sup>ns</sup>         | <b>1.85 (1.84, 1.86)</b>    | 1.82 (1.81, 1.84) <sup>**</sup>            |
| Verb            | 1.72 (1.71, 1.73)          | <b>1.74 (1.73, 1.75)</b> <sup>***</sup> | 1.714 (1.706, 1.723)        | <b>1.756 (1.745, 1.764)</b> <sup>***</sup> |
| Adjective       | 1.38 (1.37, 1.39)          | <b>1.63 (1.61, 1.64)</b> <sup>***</sup> | 1.488 (1.469, 1.494)        | <b>1.58 (1.55, 1.60)</b> <sup>***</sup>    |
| Adverb          | <b>1.51 (1.495, 1.516)</b> | 1.38 (1.35, 1.40) <sup>***</sup>        | <b>1.49 (1.48, 1.50)</b>    | 1.36 (1.34, 1.39) <sup>***</sup>           |
| Pronoun         | <b>1.72 (1.71, 1.73)</b>   | 1.27 (1.19, 1.32) <sup>***</sup>        | <b>1.695 (1.685, 1.704)</b> | 1.31 (1.28, 1.36) <sup>***</sup>           |
| Preposition     | 1.62 (1.61, 1.63)          | <b>1.66 (1.65, 1.65)</b> <sup>***</sup> | 1.678 (1.672, 1.683)        | <b>1.691 (1.686, 1.697)</b> <sup>***</sup> |

Table S3: Median values of Shannon Entropy (ShEn) for all text properties and for all fictional text categories. ShEn values were analyzed for contemporary fictional ( $N = 204$ ) vs. non-fictional ( $N = 122$ ) texts, and for earlier fictional ( $N = 206$ ) vs. earlier non-fictional ( $N = 185$ ) texts. The asterisks indicate whether the differences between the two text categories in contemporary or earlier text categories are statistically significant (Mann-Whitney U test; ns, not significant; \*,  $p \leq 0.05$ ; \*\*,  $p \leq 0.01$ ; and \*\*\*,  $p \leq 0.001$ ). Values that are significantly higher within a pair of columns are shown in boldface. 95% confidence intervals for the median (according to [18]) are shown in parentheses. Data for earlier texts are from the study by Mohseni *et al.* [19].

| Text Property   | Contemporary               |                                           | Earlier                  |                                            |
|-----------------|----------------------------|-------------------------------------------|--------------------------|--------------------------------------------|
|                 | Fictional                  | Non-Fictional                             | Fictional                | Non-Fictional                              |
| Sentence Length | 3.39 (3.37, 3.42)          | <b>3.89 (3.84, 3.91)</b> <sup>***</sup>   | 3.96 (3.91, 4.03)        | <b>4.10 (4.07, 4.16)</b> <sup>***</sup>    |
| Noun            | 2.05 (2.02, 2.06)          | <b>2.07 (2.05, 2.08)</b> <sup>**</sup>    | 1.98 (1.97, 1.99)        | 1.97 (1.95, 1.99) <sup>ns</sup>            |
| Verb            | 1.79 (1.78, 1.80)          | <b>1.82 (1.81, 1.83)</b> <sup>***</sup>   | 1.785 (1.779, 1.792)     | <b>1.844 (1.836, 1.853)</b> <sup>***</sup> |
| Adjective       | 1.41 (1.40, 1.42)          | <b>1.68 (1.66, 1.69)</b> <sup>***</sup>   | 1.52 (1.51, 1.53)        | <b>1.63 (1.61, 1.66)</b> <sup>***</sup>    |
| Adverb          | <b>1.54 (1.52, 1.56)</b>   | 1.41 (1.38, 1.43) <sup>***</sup>          | <b>1.52 (1.51, 1.53)</b> | 1.40 (1.37, 1.42) <sup>***</sup>           |
| Pronoun         | <b>1.81 (1.807, 1.820)</b> | 1.33 (1.24, 1.40) <sup>***</sup>          | <b>1.79 (1.78, 1.80)</b> | 1.37 (1.33, 1.42) <sup>***</sup>           |
| Preposition     | 1.66 (1.657, 1.673)        | <b>1.71 (1.705, 1.720)</b> <sup>***</sup> | 1.736 (1.729, 1.744)     | <b>1.76 (1.75, 1.77)</b> <sup>***</sup>    |

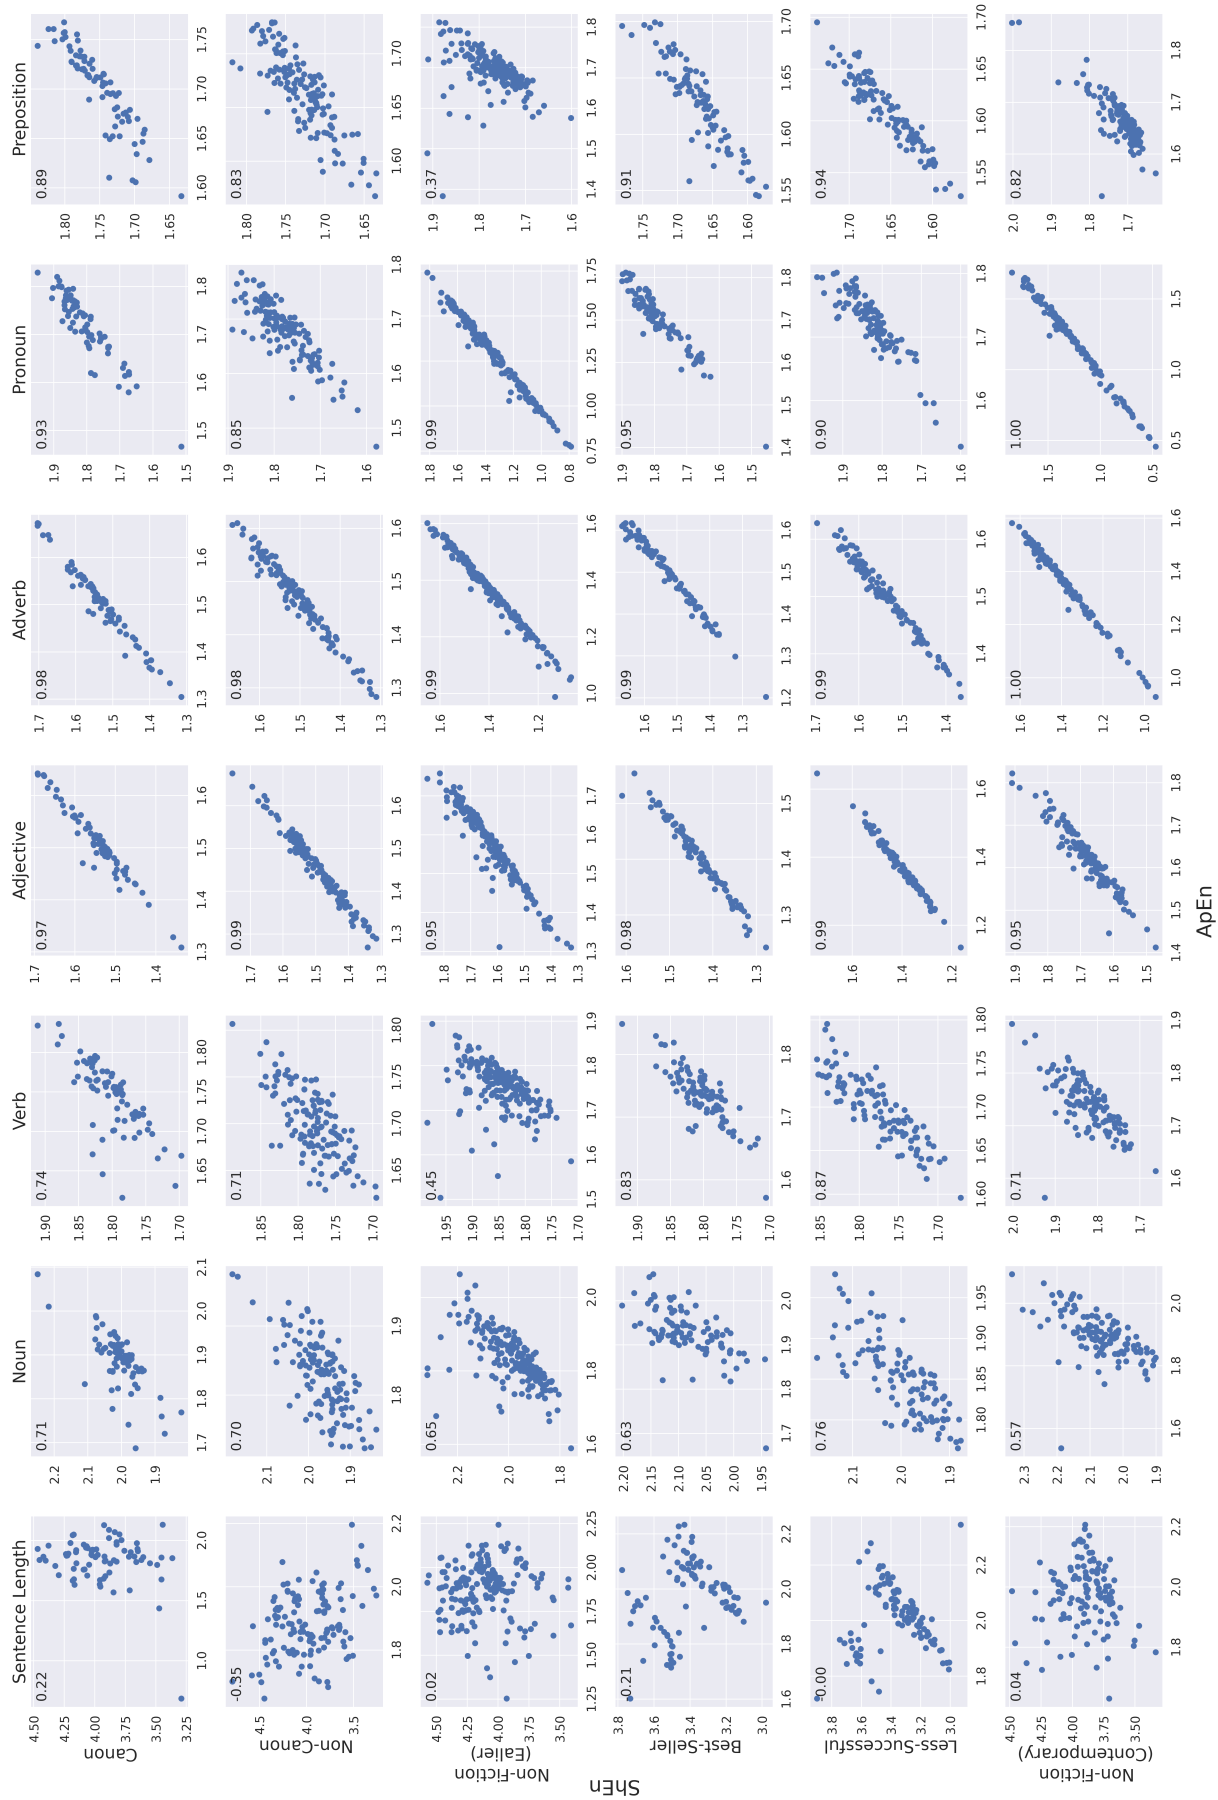

**Figure S3.** Approximate Entropy (ApEn; x-axis) vs. Shannon Entropy (ShEn; y-axis) for each text category (rows) and for each text property (columns). The correlation value is shown on the top left corner of each plot. To make the plots more readable, two outliers, which were both nonfictional texts written in the 19<sup>th</sup> century, were removed: A Dictionary of English Synonyms and Synonymous Expressions by Richard Soule and A Synopsis of the Birds of North America by John James Audubon.

## References

1. Kumar, A.; Lease, M.; Baldridge, J. Supervised Language Modeling for Temporal Resolution of Texts. *Proceedings of the 20th ACM International Conference on Information and Knowledge Management; Association for Computing Machinery: New York, NY, USA, 2011; CIKM '11*, p. 2069–2072. doi:10.1145/2063576.2063892.
2. Garcia-Fernandez, A.; Ligozat, A.L.; Dinarelli, M.; Bernhard, D. When Was It Written? Automatically Determining Publication Dates. *Proceedings of the 18th International Conference on String Processing and Information Retrieval; Springer-Verlag: Berlin, Heidelberg, 2011; SPIRE'11*, p. 221–236.
3. Ciobanu, A.M.; Dinu, L.P.; Şulea, O.M.; Dinu, A.; Niculae, V. Temporal Text Classification for Romanian Novels set in the Past. *Proceedings of the International Conference Recent Advances in Natural Language Processing RANLP 2013; INCOMA Ltd. Shoumen, BULGARIA: Hissar, Bulgaria, 2013; pp. 136–140.*
4. Štajner, S.; Zampieri, M. Stylistic Changes for Temporal Text Classification. *Lecture Notes in Computer Science. Springer, Berlin, Heidelberg, 2013, Vol. 8082, pp. 519–526. doi:10.1007/978-3-642-40585-3\_65.*
5. Gómez-Adorno, H.; Posadas-Duran, J.P.; Ríos-Toledo, G.; Sidorov, G.; Sierra, G. Stylometry-Based Approach for Detecting Writing Style Changes in Literary Texts. *Computación y Sistemas* **2018**, *22*, 47–53.
6. Efremova, J.; García, A.M.; Zhang, J.; Calders, T. Effects of Evolutionary Linguistics in Text Classification. *International Conference on Statistical Language and Speech Processing. Springer, 2015, pp. 50–61. doi:10.46298/jdmdh.5864.*
7. Liebeskind, C.; Liebeskind, S. Deep Learning for Period Classification of Historical Hebrew Texts. *Journal of Data Mining & Digital Humanities* **2020**, *2020*.
8. Gopidi, A.; Alam, A. Computational Analysis of the Historical Changes in Poetry and Prose. *Proceedings of the 1st International Workshop on Computational Approaches to Historical Language Change; Association for Computational Linguistics: Florence, Italy, 2019; pp. 14–22. doi:10.18653/v1/W19-4702.*
9. Lagutina, K.; Poletaev, A.; Lagutina, N.; Boychuk, E.; Paramonov, I. Automatic Extraction of Rhythm Figures and Analysis of Their Dynamics in Prose of 19th–21st Centuries. *26th Conference of Open Innovations Association (FRUCT), 2020, pp. 247–255. doi:10.23919/FRUCT48808.2020.9087430.*
10. Lagutina, K.V.; Manakhova, A.M. Automated Search and Analysis of the Stylometric Features That Describe the Style of the Prose of 19th–21st Centuries. *Automatic Control and Computer Sciences* **2021**, *55*, 866–876. doi:10.3103/S0146411621070257.
11. Degaetano-Ortlieb, S. Stylistic Variation Over 200 Years of Court Proceedings According to Gender and Social Class. *Proceedings of the Second Workshop on Stylistic Variation; Association for Computational Linguistics: New Orleans, 2018; pp. 1–10. doi:10.18653/v1/W18-1601.*
12. Fankhauser, P.; Knappen, J.; Teich, E. Topical Diversification Over Time In The Royal Society Corpus; Jagiellonian University; Pedagogical University: Kraków, 2016; Digital Humanities.
13. Bizzoni, Y.; Degaetano-Ortlieb, S.; Fankhauser, P.; Teich, E. Linguistic Variation and Change in 250 Years of English Scientific Writing: A Data-Driven Approach. *Frontiers in Artificial Intelligence* **2020**, *3*. doi:10.3389/frai.2020.00073.
14. Wang, G.; Wang, H.; Sun, X.; Nan, W.; Wang, L. Linguistic complexity in scientific writing: A large-scale diachronic study from 1821 to 1920. *Scientometrics* **2022**, *128*, 441–460. doi:10.1007/s11192-022-04550-z.
15. Degaetano-Ortlieb, S.; Strötgen, J. Diachronic Variation of Temporal Expressions in Scientific Writing Through the Lens of Relative Entropy. *Language Technologies for the Challenges of the Digital Age; Rehm, G.; Declerck, T., Eds.; Springer International Publishing: Cham, 2018; pp. 259–275.*
16. Krielke, M.P.; Fischer, S.; Degaetano-Ortlieb, S.; Teich, E. System and use of wh-relativizers in 200 years of English scientific writing. *Proceedings of the 10th International Corpus Linguistics Conference, Cardiff, Wales, UK, 2019.*
17. US Novel Corpus. [https://textual-optics-lab.uchicago.edu/us\\_novel\\_corpus](https://textual-optics-lab.uchicago.edu/us_novel_corpus). Accessed: 01-03-2023.
18. Zar, J.H. *Biostatistical Analysis*, 5 ed.; Pearson: Upper Saddle River, NJ, 2010.
19. Mohseni, M.; Redies, C.; Gast, V. Approximate Entropy in Canonical and Non-Canonical Fiction. *Entropy* **2022**, *24*. doi:10.3390/e24020278.
